# Supplementary material for: Increasing Antibody Responses to Five Doses of SARS-CoV-2 mRNA Vaccine in Lung Transplant Patients
Source: MDPI journal article supplement (doi:10.3390/jcm12124125), 2023-06-18
Supplement: s1 [file s1]

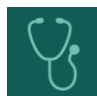

**Supplement 1.** Baseline characteristics of all SARS-CoV-2 vaccinated LTx patients, responders, non-responders and Post-COVID-19 Responders.

| Variable<br>n, (%)                 | All patients<br>292 | Responders<br>123 (42) | Non-<br>responders<br>126 (43) | <i>p</i> -value * | Post-COVID-19<br>Responders #<br>43 (15) |
|------------------------------------|---------------------|------------------------|--------------------------------|-------------------|------------------------------------------|
| Age, years                         | 60 (48-66)          | 58 (40-64)             | 62 (54-66)                     | 0.004             | 61 (49-66)                               |
| Gender, male (%)                   | 152 (52)            | 69 (56)                | 64 (51)                        | 0.402             | 19 (44)                                  |
| Caucasian, n (%)                   | 281 (96)            | 120 (98)               | 124 (98)                       | 0.549             | 38 (88)                                  |
| Transplant indication, n (%)       |                     |                        |                                | 0.106             |                                          |
| COPD                               | 120 (41)            | 51 (42)                | 53 (42)                        |                   | 16 (37)                                  |
| Fibrosis                           | 63 (21)             | 23 (19)                | 32 (25)                        |                   | 8 (19)                                   |
| Pulmonary hypertension             | 35 (12)             | 11 (9)                 | 18 (14)                        |                   | 6 (14)                                   |
| Cystic fibrosis                    | 43 (15)             | 23 (19)                | 17 (14)                        |                   | 3 (7)                                    |
| Other                              | 31 (11)             | 15 (12)                | 6 (5)                          |                   | 10 (23)                                  |
| Bilateral LTx, n (%)               | 267 (91)            | 118 (96)               | 113 (90)                       | 0.057             | 36 (84)                                  |
| Time since transplant **,<br>years | 8 (4-12)            | 9 (5-13)               | 7 (4-11)                       | 0.047             | 8 (5-12)                                 |
| Comorbidities, n (%)               |                     |                        |                                |                   |                                          |
| Hypertension                       | 137 (47)            | 54 (44)                | 64 (51)                        | 0.276             | 19 (44)                                  |
| Dyslipidemia                       | 236 (81)            | 101 (82)               | 100 (79)                       | 0.583             | 35 (81)                                  |
| Diabetes Mellitus                  | 99 (34)             | 42 (34)                | 46 (37)                        | 0.697             | 11 (26)                                  |
| Chronic kidney disease             | 205 (70)            | 77 (63)                | 99 (79)                        | 0.006             | 29 (67)                                  |
| Obesitas, BMI> 30                  | 33 (11)             | 12 (10)                | 14 (11)                        | 0.727             | 7 (16)                                   |
| Heart failure                      | 27 (9)              | 11 (9)                 | 12 (10)                        | 0.874             | 4 (9)                                    |
| Immunosuppression, n (%)           |                     |                        |                                |                   |                                          |
| Tacrolimus                         | 245 (84)            | 100 (81)               | 105(83)                        | 0.372             | 40 (93)                                  |
| Cyclosporine                       | 10 (4)              | 5 (4)                  | 3 (2)                          | 0.455             | 2 (5)                                    |
| Azathioprine                       | 57 (22)             | 27 (22)                | 22 (18)                        | 0.377             | 8 (19)                                   |
| Mycophenalte mofetil               | 199 (76)            | 80 (65)                | 85 (68)                        | 0.686             | 34 (79)                                  |
| mTORi                              | 12 (5)              | 5 (4)                  | 6 (5)                          | 0.781             | 1 (2)                                    |
| CLAD                               | 86 (30)             | 33 (27)                | 41 (33)                        | 0.324             | 12 (30)                                  |
| COVID-19, n (%)                    | 146 (50)            | 49 (40)                | 54 (43)                        | 0.629             | 43 (100)                                 |
| All-cause mortality (%)            | 20 (7)              | 3 (2)                  | 17 (14)                        | 0.001             | 0 (0)                                    |
| COVID-19 mortality (%)             | 4 (1)               | 0 (0)                  | 4 (3)                          | 0.046             | 0 (0)                                    |

Continuous variables are expressed as median (interquartile range).

COPD, chronic obstructive pulmonary disease; LTx, lung transplantation; mTORi, mammalian target of rapamycin inhibitors (everolimus or sirolimus)

# Post-COVID-19 responders: Patients with an previously negative vaccine antibody response, but a positive antibody response after a positive SARS-COV-2 antigen test.

\* *p*-value for the difference between responders and non-responders

\*\* time between transplant and first vaccination
